# Supplementary material for: Evaluation of Antimicrobial Properties and Potential Applications of Pseudomonas gessardii M15 Rhamnolipids towards Multiresistant Staphylococcus aureus
Source: MDPI journal article supplement (doi:10.3390/pharmaceutics15020700), 2023-02-19
Supplement: s1 [file s1]

# Antimicrobial properties of *Pseudomonas gessardii* M15 rhamnolipids towards multiresistant *Staphylococcus aureus* and potential applications

**Carmine Buonocore <sup>1,2,†</sup>, Rosa Giugliano <sup>3,†</sup>, Gerardo Della Sala <sup>1</sup>, Fortunato Palma Esposito <sup>1</sup>, Pietro Tedesco <sup>1</sup>, Veronica Folliero <sup>3</sup>, Massimiliano Galdiero <sup>3</sup>, Gianluigi Franci <sup>4,\*</sup> and Donatella de Pascale <sup>1,\*</sup>**

<sup>1</sup> Department of Ecosustainable Marine Biotechnology Stazione Zoologica Anton Dohrn, Via Ammiraglio Acton, 55, 80133 Naples, Italy

<sup>2</sup> Institute of Biochemistry and Cell Biology, National Research Council, 80131 Naples, Italy

<sup>3</sup> Department of Experimental Medicine, University of Campania “Luigi Vanvitelli”, 80138 Naples, Italy

<sup>4</sup> Department of Medicine, Surgery and Dentistry “Scuola Medica Salernitana”, University of Salerno, 84081 Baronissi, Italy

\* Correspondence: gfranci@unisa.it (G.F.); donatella.depascale@szn.it (D.d.P.)

† These authors contributed equally to this work.

|                                                                 |    |
|-----------------------------------------------------------------|----|
| <b>Contents</b>                                                 | 2  |
| <b>Spectral data of rhamnolipids mixtures</b>                   | 3  |
| Figure S1. Total ion chromatogram of the M15RL mixture          | 3  |
| Figure S2. Total ion chromatogram of the MDRL mixture           | 3  |
| Figure S3. Total ion chromatogram of the DDRL mixture           | 4  |
| Figure S4. HR ESI-MS2 spectrum of Rha-C10-C10                   | 4  |
| <b>Antibiograms of the <i>Staphylococcus aureus</i> strains</b> | 5  |
| Figure S5: MRSA antibiogram                                     | 5  |
| Figure S6: MSSA antibiogram                                     | 6  |
| Figure S7: $\beta$ —LPSA antibiogram                            | 7  |
| Figure S8: QRSA antibiogram                                     | 8  |
| Figure S9: VRSA antibiogram                                     | 9  |
| Figure S10: MLSB antibiogram                                    | 10 |
| <b>M15RL stability to pH</b>                                    | 11 |
| Figure S11: M15RL antimicrobial stability to different pH       | 11 |

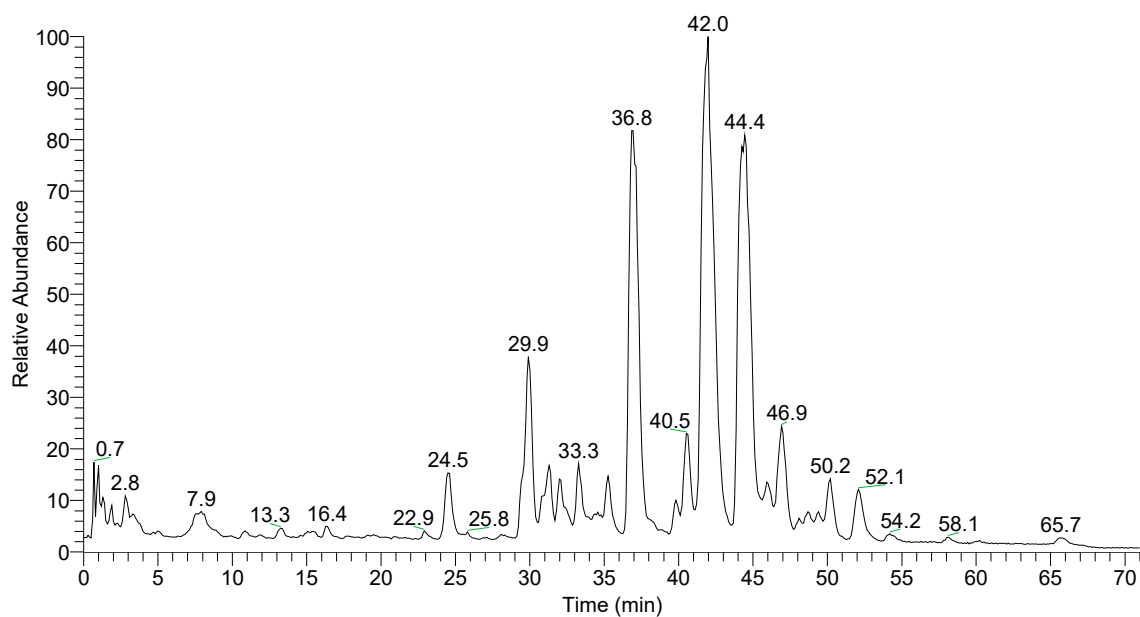

**Figure S1.** Total ion chromatogram of the M15RL mixture.

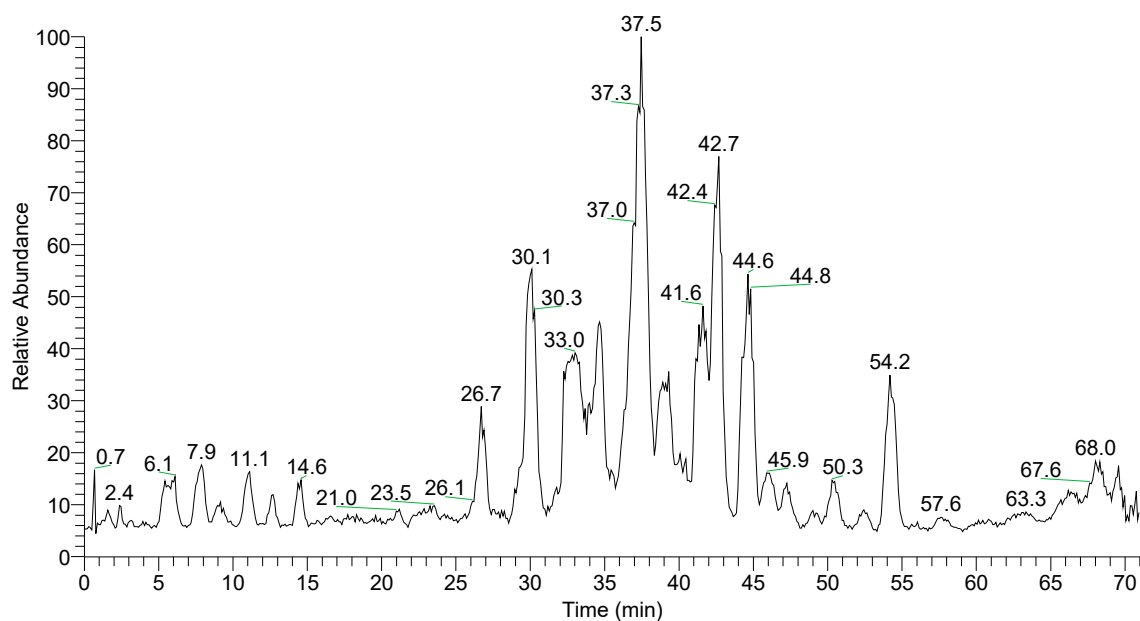

**Figure S2.** Total ion chromatogram of the MDRL mixture.

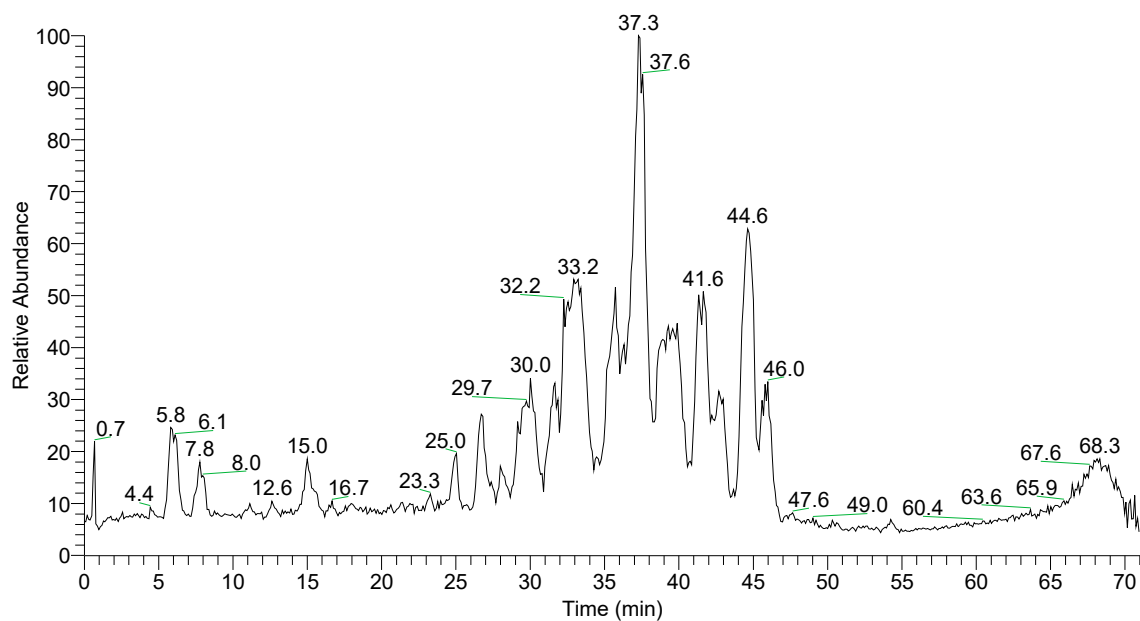

**Figure S3.** Total ion chromatogram of the DDRL mixture.

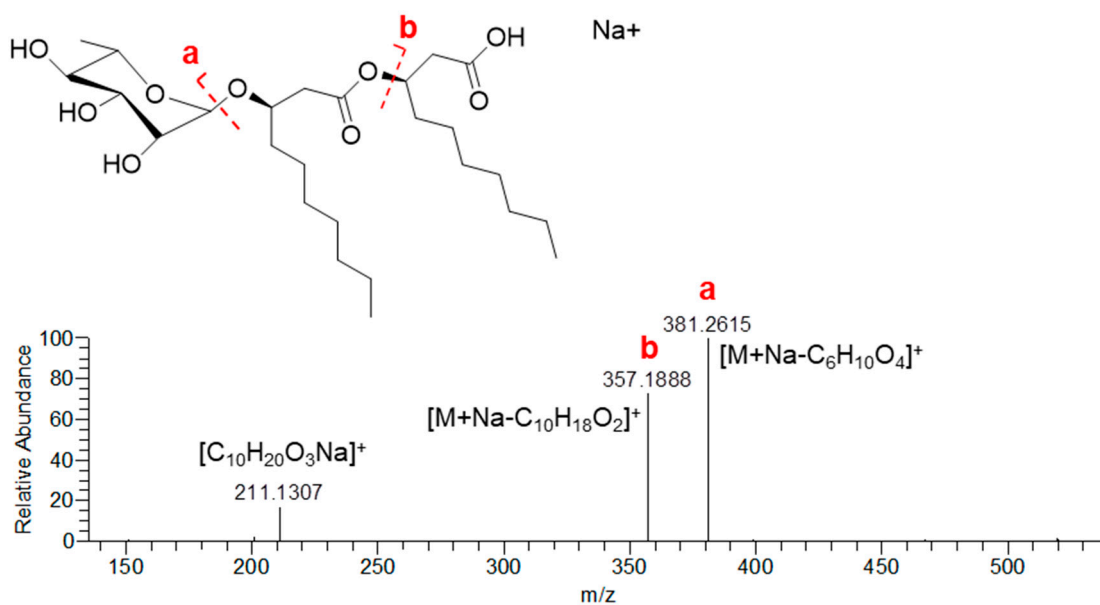

**Figure S4.** HR ESI-MS2 spectrum of the  $[M+Na]^+$  ion of Rha-C10-C10 ( $C_{26}H_{48}O_9Na$ ,  $m/z$  527.3199 –  $\Delta$ ppm 1.6)

## SERVIZIO DI MICROBIOLOGIA

ST. AUKEUS MRSA  
312215Cliente bioMerieux: S U N  
N. sistema: 1498

## Lab report

Stampato 27-nov-2015 11:44 CET  
Stampato da: LabAdmin

Nome paziente: [REDACTED]

\*\*\* Allerta applicato \*\*\*

ID paziente: 52187

Gruppo di isolati: 52187.11-1

Tipo di card: AST-P632 Test dello strumento: 00000B4D4CDB (1498)

Quantità organismo:

|           |                       |
|-----------|-----------------------|
| Commenti: | ATTENZIONE CEPPO MRSA |
|           |                       |
|           | ATTENZIONE CEPPO MRSA |

|                                                                                                                                                                                                                                                                                                                                                                             |                       |     |          |
|-----------------------------------------------------------------------------------------------------------------------------------------------------------------------------------------------------------------------------------------------------------------------------------------------------------------------------------------------------------------------------|-----------------------|-----|----------|
| Informazioni sull'identificazione                                                                                                                                                                                                                                                                                                                                           |                       |     |          |
| Microrganismo selezionato                                                                                                                                                                                                                                                                                                                                                   | Staphylococcus aureus |     |          |
| Immessi:                                                                                                                                                                                                                                                                                                                                                                    | 25-nov-2015 10:33 CET | Da: | labadmin |
| <b>Messaggi di analisi:</b><br>Un test ICR positivo indica resistenza inducibile ai macrolidi, lincosamidi e streptogramina tipo B. Tale isolato si presume resistente alla clindamicina che tuttavia potrebbe essere efficace in alcuni casi.<br><br>Resistenza a basso livello - una MIC di 2, 4, 32, 64 per la mupirocina rappresenta l'intero range intermedio (2-256). |                       |     |          |

|                                         |                                   |                 |                              |         |                              |  |
|-----------------------------------------|-----------------------------------|-----------------|------------------------------|---------|------------------------------|--|
| Informazioni sull'antibiogramma         | Card: AST-P632                    |                 | Numero di lotto: 732366110   |         | Scade: 22-dic-2016 12:00 CET |  |
|                                         | Completato: 25-nov-2015 20:07 CET |                 | Stato: Finale                |         | Tempo di analisi: 10,00 ore  |  |
| Antimicrobico                           | MIC                               | Interpretazione | Antimicrobico                | MIC     | Interpretazione              |  |
| Cefoxitina screening                    | POS                               | +               | Teicoplanina                 | <= 0,5  | S                            |  |
| Benzilpenicillina                       | > 0,25                            | R               | Vancomicina                  | <= 0,5  | S                            |  |
| Oxacillina                              | > 2                               | R               | Tetraciclina                 | <= 1    | S                            |  |
| Gentamicina                             | > 8                               | R               | Tigeciclina                  | <= 0,12 | S                            |  |
| Levofloxacina                           | > 4                               | R               | Fosfomicina                  | > 64    | R                            |  |
| Resistenza inducibile alla Clindamicina | POS                               | +               | Acido fusidico               | <= 0,5  | S                            |  |
| Eritromicina                            | > 4                               | R               | Mupirocina                   | <= 2    | S                            |  |
| Clindamicina                            | 0,25                              | *R              | Rifampicina                  | > 2     | R                            |  |
| Linezolid                               | 2                                 | S               | Trimetoprim/Sulfametossazolo | 20      | S                            |  |
| Daptomicina                             | 0,25                              | S               |                              |         |                              |  |

+= Antibiotici dedotti \* = Modificato AES \*\* = Modificato utente

Versione di VITEK 2 Systems installata: 07.01  
Linea guida interpretazione MIC: EUCAST 2015\_MICETI  
Nome del set di parametri AES: EUCAST\_2015\_MICETILinea guida interpretazione terapeutica: Copia di EUCAST-based\_2015  
Ultima modifica parametri AES: 2-nov-2015 14:13 CET

Pagina 1 di 2

Figure S5. Antibigram of the MRSA strain

Cliente bioMerieux:

Lab report

Stampato 18-nov-2014 11:07 CST

N. sistema:

Stampato da: labadmin

Nome paziente: [REDACTED] 24/3/92

\*\*\* Allerta applicato \*\*\*

ID paziente: 50574

Gruppo di isolati: 50574 11-1

Organismo selezionato: Staphylococcus aureus

|           |                        |
|-----------|------------------------|
| Commenti: | ESEGUIRE TEST CEFINASI |
|           |                        |

|                                   |                                            |
|-----------------------------------|--------------------------------------------|
| Informazioni sull'identificazione |                                            |
| Microorganismo selezionato        | Staphylococcus aureus                      |
| Messaggi di analisi:              | Imnesso: 7-nov-2014 11:46 CST Da: labadmin |

|                                         |             |                         |                              |           |                   |                          |
|-----------------------------------------|-------------|-------------------------|------------------------------|-----------|-------------------|--------------------------|
| Informazioni sull'antibiogramma         | Card:       | AST-P632                | Numero di lotto:             | 732323640 | Scade:            | 24-ott-2015<br>13:00 CDT |
|                                         | Completato: | 7-nov-2014<br>20:08 CST | Stato:                       | Finale    | Tempo di analisi: | 8,50 ore                 |
| Antimicrobico                           | MIC         | Interpretazione         | Antimicrobico                | MIC       | Interpretazione   |                          |
| Cefoxitina screening                    | NEG         | -                       | Teicoplanina                 | <= 0,5    | S                 |                          |
| Benzilpenicillina                       | 0,06        | S                       | Vancomicina                  | <= 0,5    | S                 |                          |
| Oxacillina                              | <= 0,25     | S                       | Tetraciclina                 | <= 1      | S                 |                          |
| * Gentamicina                           | <= 0,5      | S                       | Tigeciclina                  | <= 0,12   | S                 |                          |
| Levofloxacina                           | <= 0,12     | S                       | Fosfomicina                  |           |                   |                          |
| Resistenza inducibile alla Clindamicina | NEG         | -                       | Acido fusidico               | <= 0,5    | S                 |                          |
| Entromicina                             | 0,5         | S                       | Mupirocina                   | <= 2      |                   |                          |
| Clindamicina                            | 0,25        | S                       | Rifampicina                  | <= 0,03   | S                 |                          |
| Linezolid                               | 2           | S                       | Trimetoprim/Sulfametossazolo | <= 10     | S                 |                          |
| Daptomicina                             | 0,5         | S                       |                              |           |                   |                          |

+= Antibiotici dedotti \*= Modificato AES \*\*= Modificato utente

|                          |                                       |                                                |
|--------------------------|---------------------------------------|------------------------------------------------|
| Conclusioni AES:         | Ultima modifica: 8-apr-2014 09:18 CDT | Set di parametri: EUCAST2014+MICETI vers. 5.04 |
| Livello di affidabilità: | Coerente                              |                                                |
| Fenotipo:                | MACROLIDI/LINCOSAMIDI/STREPTOGRAMINE  | RESISTENTE ALLE STREPTOGRAMINE (SGA-SGB)       |

Azione Revisionato da: Nome (ID utente) (labadmin) Data/Ora 10-nov-2014 09:08 CST Commento

Versione di VITEK 2 Systems installata: 05.04

Linea guida interpretazione MIC: EUCAST\_MOD\_2014

Linea guida interpretazione terapeutica: EUCAST-based\_MOD\_2014

Nome del set di parametri AES: EUCAST2014+MICETI vers. 5.04

Ultima modifica parametri AES: 8-apr-2014 09:18 CDT

Figure S6. Antibigram of the MSSA strain

st. aureus  $\beta$   
31/2/15

Cliente bioMerieux:

Lab report

Stampato 18-nov-2014 11:06 CST

N. sistema:

Stampato da: labadmin

Nome paziente: [REDACTED] 31/3/89

ID paziente: 52279.10

Gruppo di isolati: 52279-1

Organismo selezionato: Staphylococcus aureus

|                  |  |
|------------------|--|
| <b>Commenti:</b> |  |
|                  |  |
|                  |  |

|                                             |                       |
|---------------------------------------------|-----------------------|
| <b>Informazioni sull'identificazione</b>    |                       |
| <b>Microrganismo selezionato</b>            | Staphylococcus aureus |
| Imnesso: 23-ott-2014 11:19 CDT Da: labadmin |                       |
| <b>Messaggi di analisi:</b>                 |                       |

| Informazioni sull'antibiogramma         |        |                 | Card:                        | AST-P632                 | Numero di lotto: | 732323640 | Scade:            | 24-ott-2015<br>13:00 CDT |
|-----------------------------------------|--------|-----------------|------------------------------|--------------------------|------------------|-----------|-------------------|--------------------------|
|                                         |        |                 | Completato:                  | 23-ott-2014<br>17:48 CDT | Stato:           | Finale    | Tempo di analisi: | 8,25 ore                 |
| Antimicrobico                           | MIC    | Interpretazione | Antimicrobico                | MIC                      | Interpretazione  |           |                   |                          |
| Cefoxitina screening                    | NEG    | -               | Teicoplanina                 | <= 0,5                   | S                |           |                   |                          |
| Benzilpenicillina                       | >= 0,5 | R               | Vancomicina                  | 1                        | S                |           |                   |                          |
| Oxacillina                              | 0,5    | S               | Tetraciclina                 | <= 1                     | S                |           |                   |                          |
| Gentamicina                             | 4      | R               | Tigeciclina                  | <= 0,12                  | S                |           |                   |                          |
| Levofloxacina                           | 0,25   | S               | Fosfomicina                  |                          |                  |           |                   |                          |
| Resistenza inducibile alla Clindamicina | NEG    | -               | Acido fusidico               | <= 0,5                   | S                |           |                   |                          |
| Eritromicina                            | >= 8   | R               | Mupirocina                   | <= 2                     |                  |           |                   |                          |
| Clindamicina                            | 0,25   | S               | Rifampicina                  | <= 0,03                  | S                |           |                   |                          |
| Linezolid                               | 2      | S               | Trimetoprim/Sulfametossazolo | <= 10                    | S                |           |                   |                          |
| Daptomicina                             | 1      | S               |                              |                          |                  |           |                   |                          |

+ = Antibiotici dedotti \* = Modificato AES \*\* = Modificato utente

|                                 |          |                                       |                                                   |
|---------------------------------|----------|---------------------------------------|---------------------------------------------------|
| <b>Conclusioni AES:</b>         |          | Ultima modifica: 8-apr-2014 09:18 CDT | Set di parametri: EUCAST2014+MICE<br>Tivers. 5.04 |
| <b>Livello di affidabilità:</b> | Coerente |                                       |                                                   |

|                 |                  |                      |          |
|-----------------|------------------|----------------------|----------|
| Azione          | Nome (ID utente) | Data/Ora             | Commento |
| Revisionato da: | (labadmin)       | 3-nov-2014 12:13 CST |          |

Versione di VITEK 2 Systems installata: 05.04

Linea guida interpretazione MIC: EUCAST\_MOD\_2014

Linea guida interpretazione terapeutica: EUCAST-based\_MOD\_2014

Nome del set di parametri AES: EUCAST2014+MICETivers. 5.04

Ultima modifica parametri AES: 8-apr-2014 09:18 CDT

Pagina 1 di 1

Figure S7. Antibigram of the  $\beta$ -LPSA strain

| REFERTO - FINALE                                                                                                                                                                       |                                                                        |
|----------------------------------------------------------------------------------------------------------------------------------------------------------------------------------------|------------------------------------------------------------------------|
| Pagina 1/1<br>26/07/2017 10:08:46                                                                                                                                                      |                                                                        |
| <b>Nome paziente:</b> <span style="background-color: black; color: black;">XXXXXXXXXX</span><br><b>Data di nascita:</b>                                                                | <b>ID paziente:</b> 51883.07<br><b>Sesso paziente:</b> Non specificato |
| <b>N accesso:</b> 51883.07<br><b>Tipo campione:</b> CATETERE VENOSO CENTRALE<br><b>Reperto ospedaliero:</b> 7301 TER INTENSIVA NEONATALE<br><b>Data ricezione:</b> 21/07/2017 09:49:51 |                                                                        |

**Nome organismo**

**Commenti**

1 STAAUE Staphylococcus aureus

**Marker di resistenza**

1 STAIML Fenotipo MLSb inducibile di Staphylococcus

| Antibiotico                 | STAAUE    |     |
|-----------------------------|-----------|-----|
|                             | MIC/Conc. | SIR |
| Acido fusidico              | <=0,5     | S   |
| Ampicillina                 |           | R   |
| Ceftaroline                 | 0,5       | S   |
| Ciprofloxacina              | >4        | R   |
| Clindamicina                |           | R   |
| Daptomicina                 | <=0,5     | S   |
| Eritromicina                | >2        | R   |
| Fosfomicina c/G6P           | <=16      | S   |
| Gentamicina                 | 2         | R   |
| Linezolid                   | 2         | S   |
| Moxifloxacina               | >1        | R   |
| Mupirocina alto livello     | <=256     | S   |
| Oxacillina                  | 0,5       | S   |
| Penicillina G               | >0,25     | R   |
| Teicoplanina                | <=0,5     | S   |
| Tetraciclina                | <=0,5     | S   |
| Tigeciclina                 | <=0,25    | S   |
| Trimetoprim-sulfametoxazolo | <=1/19    | S   |
| Vancomicina                 | 1         | S   |

Firma: \_\_\_\_\_

*S. aureus CHIN3*

**Figure S8.** Antibigram of the QRSA strain



SERVIZIO DI MICROBIOLOGIA

NOS R5  
5/12/16

Cliente bioMerieux: S U N  
N. sistema: 1498

Lab report

Stampato 4-dic-2014 10:27 CST  
Stampato da: labadmin

Nome paziente: [REDACTED] 28/02/82

\*\*\* Allerta applicato \*\*\*

ID paziente: 50211

Gruppo di isolati: 50211.12-2

Organismo selezionato: Staphylococcus aureus

|           |                                                                                                |
|-----------|------------------------------------------------------------------------------------------------|
| Commenti: | Attenzione Stafilococco Teicoplanina Resistente Attenzione Stafilococco Vancomicina Resistente |
|           |                                                                                                |

|                                   |                                            |
|-----------------------------------|--------------------------------------------|
| Informazioni sull'identificazione |                                            |
| Microrganismo selezionato         | Staphylococcus aureus                      |
|                                   | Imnesso: 3-dic-2014 10:55 CST Da: labadmin |
| Messaggi di analisi:              |                                            |

|                                         |                                    |                 |                              |                                 |                 |
|-----------------------------------------|------------------------------------|-----------------|------------------------------|---------------------------------|-----------------|
| Informazioni sull'antibiogramma         | Card: AST-P632                     |                 | Numero di lotto: 732323640   | Scade: 24-ott-2015<br>13:00 CDT |                 |
|                                         | Completato 3-dic-2014<br>22:29 CST |                 | Stato: Finale                | Tempo di analisi: 12,25 ore     |                 |
| Antimicrobico                           | MIC                                | Interpretazione | Antimicrobico                | MIC                             | Interpretazione |
| Cefoxitina screening                    | NEG                                | -               | Teicoplanina                 | <= 0,5*                         | *R              |
| Benzilpenicillina                       | >= 0,5                             | R               | Vancomicina                  | >= 32                           | R               |
| Oxacillina                              | <= 0,25                            | S               | Tetraciclina                 | <= 1                            | S               |
| Gentamicina                             | >= 16                              | R               | Tigeciclina                  | <= 0,12                         | S               |
| Levofloxacina                           | 1                                  | S               | Fosfomicina                  |                                 |                 |
| Resistenza inducibile alla Clindamicina | NEG                                | -               | Acido fusidico               | <= 0,5                          | S               |
| Eritromicina                            | 1                                  | S               | Mupirocina                   | <= 2                            |                 |
| Clindamicina                            | >= 4                               | R               | Rifampicina                  | <= 0,03                         | S               |
| Linezolid                               | 2                                  | S               | Trimetoprim/Sulfametossazolo | <= 10                           | S               |
| Daptomicina                             | 0,25                               | S               |                              |                                 |                 |

+ = Antibiotici dedotti \* = Modificato AES \*\* = Modificato utente

|                          |                                       |                                                |
|--------------------------|---------------------------------------|------------------------------------------------|
| Conclusioni AES:         | Ultima modifica: 8-apr-2014 10:22 CDT | Set di parametri: EUCAST2014+MICET lvers. 5.04 |
| Livello di affidabilità: | Coerente con la correzione            |                                                |
| Fenotipo:                | GLICOPEPTIDI                          | VRSA                                           |

Versione di VITEK 2 Systems installata: 05.04

Linea guida interpretazione MIC: EUCAST\_MOD\_2014

Nome del set di parametri AES: EUCAST2014+MICET lvers. 5.04

Linea guida interpretazione terapeutica: EUCAST-based\_MOD\_2014

Ultima modifica parametri AES: 8-apr-2014 10:22 CDT

Pagina 1 di 1

Figure S9. Antibigram of the VRSA strain

3/12/15

Ciente brivierex.

Rapporto grando microbiologia

Stampato 20-01-2014 08.43 COT

Nome paziente:

Posizione:

ID lab.: 51119

Organismo selezionato: Staphylococcus aureus

ID paziente:

Medico:

Numero di isolato: 1

Prelevato:

Origine:

Commenti:

| Informazioni sull'antibiogramma         |             |                 | Tempo di analisi: 9,50 ore   | Stato Finale |                 |
|-----------------------------------------|-------------|-----------------|------------------------------|--------------|-----------------|
| Antimicrobico                           | MIC         | Interpretazione | Antimicrobico                | MIC          | Interpretazione |
| Cefoxitina screening                    | NEG         | -               | Daptomicina                  | 1            | S               |
| Benzilpenicillina                       | $\geq 0,5$  | R               | Teisoplanina                 | $\leq 0,5$   | S               |
| Oxacillina                              | $\leq 0,25$ | S               | Vancomicina                  | $\leq 0,5$   | S               |
| Gentamicina                             | $\leq 0,5$  | S               | Tetraciclina                 | $\leq 1$     | S               |
| Levofloxacina                           | 0,25        | S               | Tigeciclina                  | $\leq 0,12$  | S               |
| Resistenza inducibile alla Clindamicina | NEG         | -               | Acido fusidico               | $\leq 0,5$   | S               |
| Eritromicina                            | $\geq 8$    | R               | Rifampicina                  | $\leq 0,03$  | S               |
| Clindamicina                            | $\geq 4$    | R               | Trimetoprim/Sulfametossazolo | $\leq 10$    | S               |
| Linezolid                               | 2           | S               |                              |              |                 |

+= Antibiotici dedotti \*= Modificato AES \*\*= Modificato utente

| Conclusioni di AES |                                      |                     |
|--------------------|--------------------------------------|---------------------|
| Affidabilità:      | Coerente                             |                     |
| Fenotipo:          | MACROLIDI/LINCOSAMIDI/STREPTOGRAMINE | MLSB+SA COSTITUTIVO |

Figure S10. Antibigram of the MLSB strain

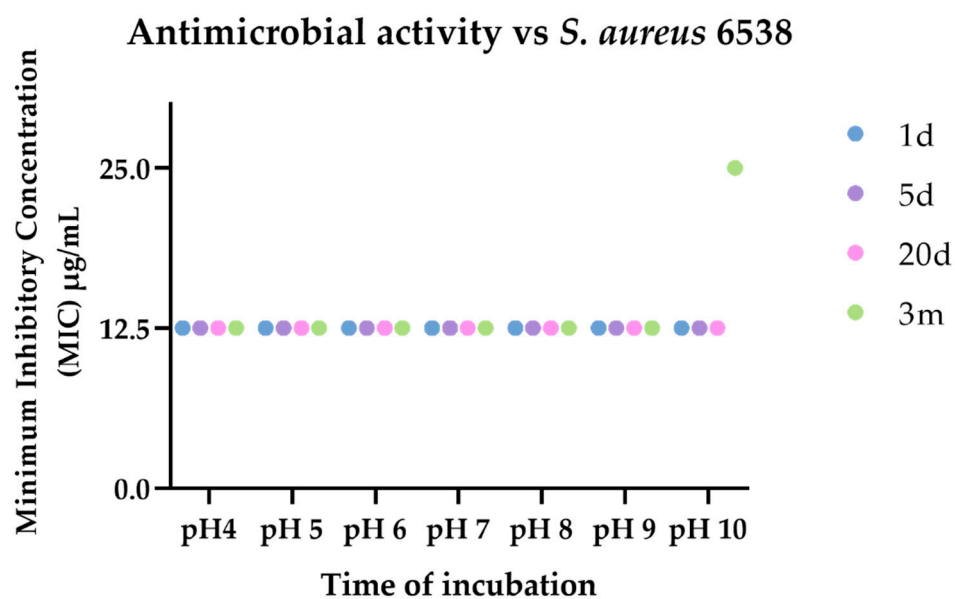

**Figure S11.** M15RL antimicrobial stability to different pH. M15RL was incubated at different pH for 3 months and tested for antimicrobial activity against *S. aureus* 6538 at different intervals.
